# Supplementary material for: Sertoli Cell Wt1 Regulates Peritubular Myoid Cell and Fetal Leydig Cell Differentiation during Fetal Testis Development
Source: PubMed Central journal article supplement (PMC5201236; doi:10.1371/journal.pone.0167920), 2016-12-30

S1\_Fig (Wen Q et al.)

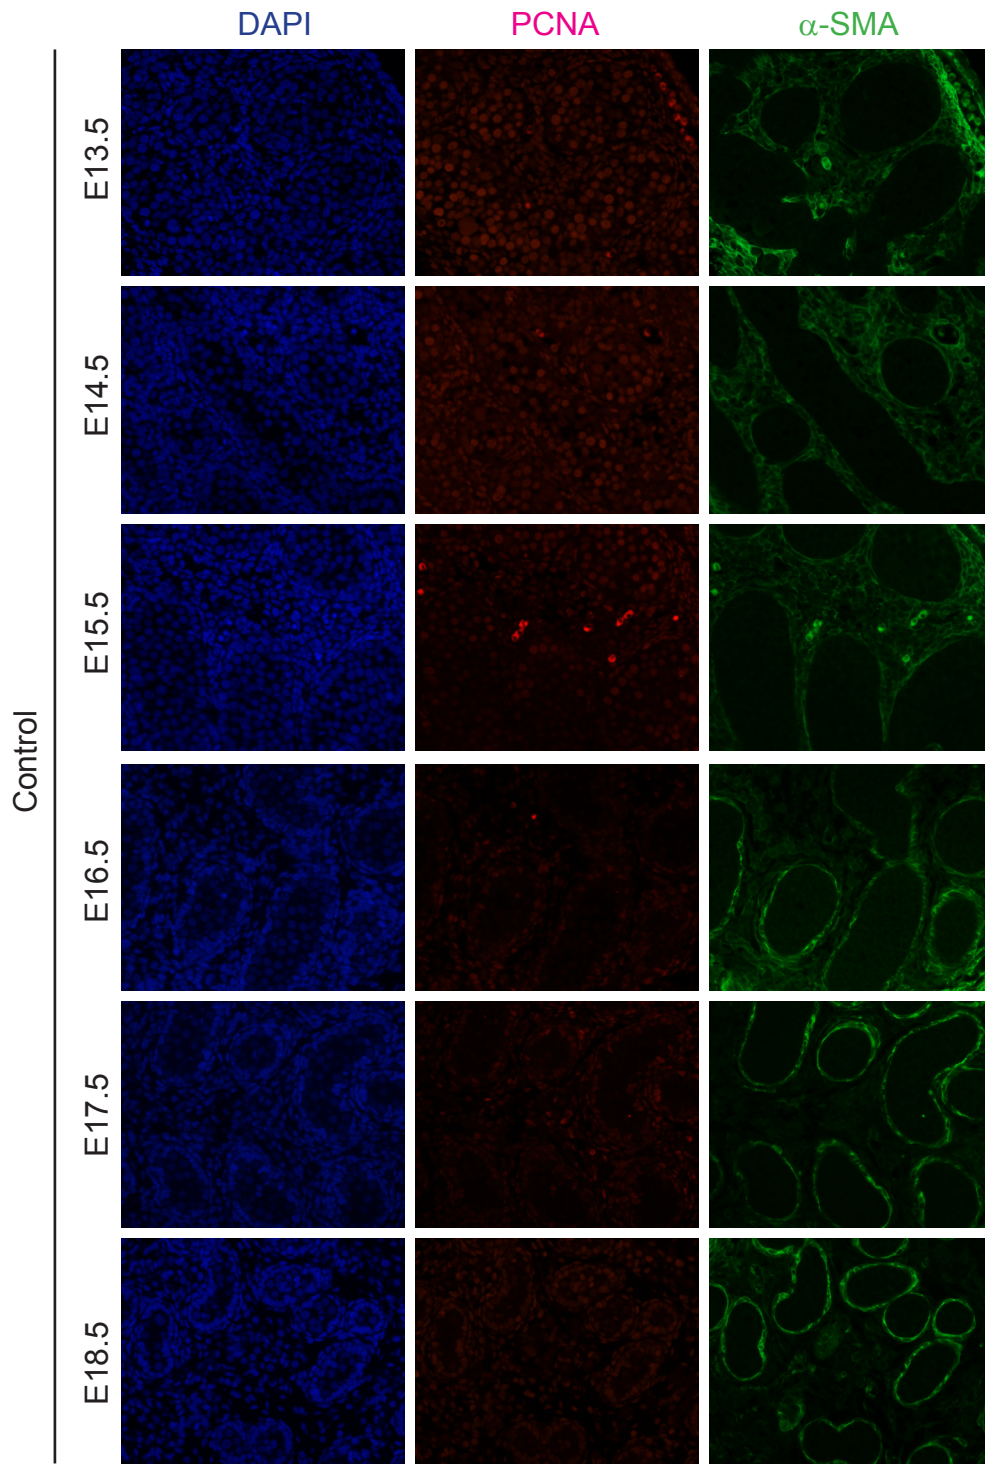

Supplement: pone.0167920.s001.pdf [file pone.0167920.s001.pdf]
